# Supplementary material
Source: HighWire-hosted journal article supplement (https://bmjopen.bmj.com/content/10/9/e035973)

eFigure 1.

Moderate

Severe

Physician

**A**

**Physician Information  
Depression Screening Test**

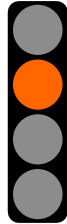

**Result**  
There is a high probability that your patient has **moderate depression**.

**Recommendation**  
Explain the finding to your patient.

Provide information about depression and treatment options (psychotherapy, pharmacotherapy).

Recommend further evaluation by a specialist physician or psychotherapist and make a referral in consultation with your patient.

**B**

**Physician Information  
Depression Screening Test**

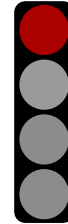

**Result**  
There is a high probability that your patient has **severe depression**.

**Recommendation**  
Explain the finding to your patient.

Discuss the topic of depression and treatment options (psychotherapy, pharmacotherapy, combined treatment) with your patient.

Emphasize the necessity of treatment.

Enquire about current suicidal tendencies. If high suicide risk is present, arrange immediate inpatient psychiatric treatment.

If no acute suicide risk is present, make a referral to a specialist or psychotherapist in consultation with your patient.

Patient

**C**

**Patient Information  
Depression Screening Test**

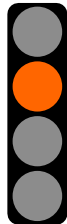

**Result**  
There is a high probability that you have **moderate depression**.

**Recommendation**  
With moderate depression you should have a more detailed examination because treatment may be necessary.

Please talk to your doctor about the screening test result. Ask for a referral to a specialist or psychotherapist. Attached is a point of contact for a more in depth assessment of depression.

There is also some information provided so you can better inform yourself about depression.

Distribution of depressive symptom severity in the general population

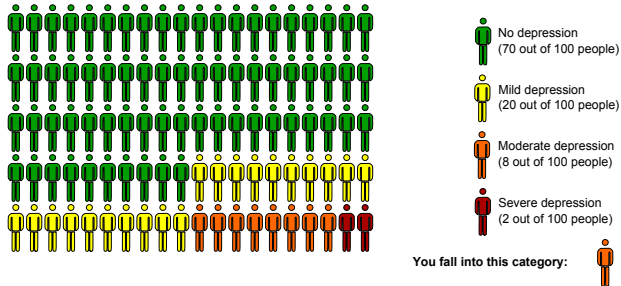

**D**

**Patient Information  
Depression Screening Test**

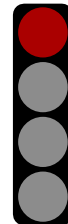

**Result**  
There is a high probability that you have **severe depression**.

**Recommendation**  
Cases of severe depression need thorough examination and treatment is very necessary.

Please talk to your doctor about the screening test result. Ask for a referral to a specialist or psychotherapist. Attached is a point of contact for a more in depth assessment of depression.

There is also some information provided so you can better inform yourself about depression.

Distribution of depressive symptom severity in the general population

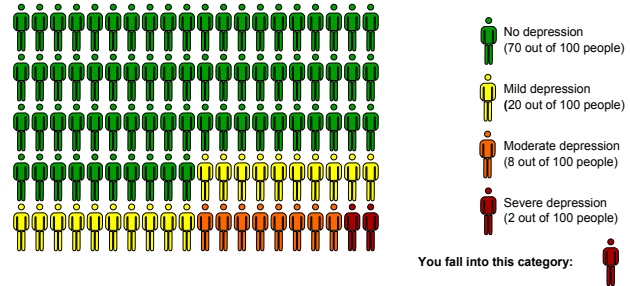

Supplement: inline-supplementary-material-2 [file inline-supplementary-material-2.pdf]
