# Supplementary material
Source: HighWire-hosted journal article supplement (https://bmjopen.bmj.com/content/10/9/e035973)

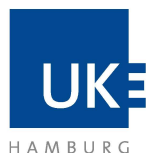

Institute and Outpatient Clinic for Psychosomatic Medicine and Psychotherapy  
Institute and Outpatient Clinic for General Medicine

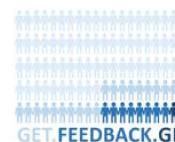

University Medical Center Hamburg-Eppendorf | Martinistraße 52 | 20246 Hamburg  
Institute and Outpatient Clinic for Psychosomatic Medicine and Psychotherapy  
Institute and Outpatient Clinic for General Medicine  
**GET.FEEDBACK.GP – GENERAL PRACTITIONER**

**Principal investigators:**

Prof. Dr. med. Dipl.-Psych. Bernd Löwe  
Prof. Dr. med. Martin Scherer

Martinistraße 52  
20246 Hamburg

[www.uke.de](http://www.uke.de)

Your patient participated in a study on psychological well-being.  
These are his / her results:

The responses indicate ...

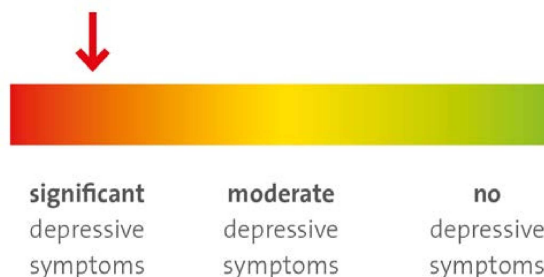

Please note that diagnosis cannot be made on the basis of this test.

This requires a personal consultation. The test merely indicates the presence of depressive symptoms. Please advise and treat your patient according to your clinical impression.

**Impressum**

This feedback information was developed by a team of general practitioners and researchers at the University Medical Center Hamburg-Eppendorf. The team is lead by Prof. Dr. Med. Dipl. Psych. Bernd Löwe (physician and psychotherapist) and Prof. Dr. Med. Martin Scherer (physician). The project is funded by the Federal Joint Committee (Gemeinsamer Bundesausschuss, Förderkennzeichen: 01VSF17033).

University Medical Center Hamburg-Eppendorf

In cooperation with:

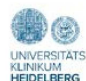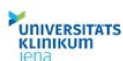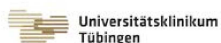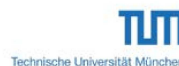

Supplement: inline-supplementary-material-3 [file inline-supplementary-material-3.pdf]
